# Supplementary material for: Transcriptional repression by ApiAP2 factors is central to chronic toxoplasmosis
Source: PLoS Pathog. 2018 May 2;14(5):e1007035. doi: 10.1371/journal.ppat.1007035 (PMC5951591; doi:10.1371/journal.ppat.1007035)
Supplement: S1 Dataset — (XLSX) [file ppat.1007035.s001.xlsx]

## Sheet: combined RH & Pru AP2IV-4KO
Dataset S1: Combined lists of mRNAs altered >2 fold in RHCre-Δap2IV-4 or PruQ-Δap2IV-4 parasites grown as tachyzoites in normal pH 7.0 media (GSE93531). Yellow highlighted genes are changed >2 fold in the same direction in both knockout parasites, Grey highlighted genes are >2 fold changed in RHCre-Δap2IV-4 parasites, and white highlighted genes are >2-fold changed in PruQ-Δap2IV-4 parasites. In …
ToxoDB ID	Parent RHCre-AP2IV-4floxed	RHCre-Δap2IV-4	Fold Change Δap2IV-4 vs parent	RHCre-Δap2IV-4 comp.	Fold Change complemented vs parent	Description	PruQ-AP2IV-4HA	PruQ-Dap2IV-4	Fold Change	CTG
TGME49_261650	30.1045	517.435	17.188	48.2163	1.60163	hypothetical protein	144.295	430.237	2.98164	261.85
TGME49_207150	19.83	320.784	16.1768	36.6015	1.84577	SRS49C (= SAG2D)	224.587	401.805	1.78908	474.055
TGME49_216140	20.8814	323.673	15.5006	58.5053	2.80179	tetratricopeptide repeat-containing protein	36.3963	301.765	8.29109	1742.38
TGME49_280580	59.6116	709.694	11.9053	116.291	1.95082	SAG4 homolog (SAG4.2)	1046.17	1899.59	1.81576	4454.94
TGME49_301890	33.3452	394.201	11.8218	153.391	4.6001	Toxoplasma gondii family B protein	473.233	541.884	1.14507	390.37
TGME49_253330	42.4414	455.802	10.7396	29.3462	0.691452	BPK1	835.052	2315.61	2.77301	1018.14
TGME49_207210	8.4806	67.692	7.98199	26.4738	3.12169	hypothetical protein	209.498	903.526	4.31282	233.811
TGME49_320190	23.9049	183.617	7.68115	56.4886	2.36305	SRS16B (= SRS9)	27.9922	256.736	9.17169	17.0975
TGME49_207130	49.0471	372.923	7.60337	54.0477	1.10195	SRS49A (= SAG2Y)	171.165	833.686	4.87065	2151.83
TGME49_208730	88.7558	588.826	6.63422	97.5568	1.09916	MCP4	248.965	887.641	3.56532	141.499
TGME49_225290	8.34129	38.4805	4.61325	11.5217	1.38129	bradyzoite-NTPase	24.8692	102.385	4.11692	428.634
TGME49_208740	654.5	2872.41	4.3887	721.696	1.10267	microneme protein	3657.32	7389.39	2.02044	226.477
TGME49_237170	64.0623	242.21	3.78086	73.4171	1.14603	hypothetical protein	934.61	733.32	-1.27449	292.119
TGME49_290970	59.9126	218.76	3.65131	112.522	1.87809	8-amino-7-oxononanoate synthase	376.065	1610.48	4.28246	475.308
TGME49_273110	49.7557	163.005	3.2761	44.9006	0.902421	SRS30D	13.2593	13.402	1.01076	19.1479
TGME49_215500	35.0186	108.136	3.08794	30.3058	0.865418	TPR repeat containing protein	43.9179	69.9347	1.5924	28.9008
TGME49_250930	58.4051	160.51	2.74821	130.129	2.22804	hypothetical protein	49.6746	43.3367	-1.14625	52.3179
TGME49_235700	121.117	316.907	2.61654	281.108	2.32096	sedoheptulose-1,7 bisphosphatse	689.518	680.971	-1.01255	435.884
TGME49_207140	241.842	619.758	2.56265	268.869	1.11175	SRS49B (= SAG2X)	169.138	496.333	2.93448	196.991
TGME49_292260	24.9192	61.9869	2.48751	23.8994	0.959075	SRS36B (= SAG5D)	20.7413	100.426	4.84184	1364.3
TGME49_250940	185.22	453.488	2.44838	484.17	2.61403	hypothetical protein	384.348	355.637	-1.08073	177.677
TGME49_301210	98.6754	235.969	2.39136	91.7787	0.930107	NAD(P) transhydrogenase	254.131	523.723	2.06084	610.477
TGME49_236010	446.692	1066.02	2.38646	477.749	1.06953	prenylcysteine oxidase	1220.61	1893.23	1.55105	1239.23
TGME49_234440	203.687	444.341	2.18149	172.261	0.845716	aminotransferase	188.965	639.761	3.38561	144.42
TGME49_246070	40.581	86.9793	2.14335	41.3407	1.01872	SRS56A	22.2098	24.4548	1.10108	32.4746
TGME49_213072	156.343	325.426	2.08148	141.601	0.905704	Sec1 domain containing family	182.089	176.771	-1.03008	746.018
TGME49_227630	19.9145	33.6716	1.69081	20.9665	1.05283	hypothetical protein	181.322	737.41	4.06685
TGME49_301170	198.579	319.158	1.60721	142.334	0.716762	SRS19D	50.5281	666.077	13.1823
TGME49_301180	385.442	570.279	1.47954	302.206	0.78405	SRS19F	222.607	628.075	2.82145
TGME49_224770	19.5015	27.445	1.40733	21.5142	1.10321	SRS40D	41.2902	164.095	3.97419
TGME49_321480	24.926	33.9586	1.36238	22.688	0.910215	SRS12B	109.809	328.552	2.99203
TGME49_237090	6.88891	8.94336	1.29823	9.06733	1.31622	AP2X-5	232.749	104.364	-2.23017
TGME49_293840	119.355	151.954	1.27312	154.694	1.29608	hypothetical protein	20.1056	109	5.42139
TGME49_224710	30.1913	37.1712	1.23119	26.9949	0.894128	vacuolar sorting receptor protein	116.661	263.145	2.25564
TGME49_256800	6.85279	8.14917	1.18918	8.581	1.25219	hypothetical protein	60.0857	126.097	2.09862
TGME49_301160	144.772	167.469	1.15678	132.142	0.912762	SRS19C (= SRS7)	160.951	395.329	2.45621
TGME49_304930	22.066	22.6758	1.02764	29.0065	1.31453	hypothetical protein	58.0509	153.245	2.63983
TGME49_255210	396.941	381.876	-1.03945	367.027	0.924637	ATPase, AAA family protein	68.6996	400.674	5.83226
TGME49_231960	645.538	600.343	-1.07528	537.692	0.832937	omega secalin, putative	755.599	320.829	-2.35515
TGME49_251170	35.7733	32.767	-1.09175	26.9037	0.752063	KRUF family protein	341.762	107.755	-3.17167
TGME49_295100	139.477	127.405	-1.09476	129.177	0.926151	hypothetical protein	234.25	114.353	-2.04848
TGME49_240060	598.783	538.402	-1.11215	461.032	0.769949	hypothetical protein	1304.62	542.901	-2.40306
TGME49_315290	206.033	184.993	-1.11373	153.077	0.742974	hypothetical protein	359.001	170.903	-2.10061
TGME49_265150	106.03	90.2316	-1.17508	98.8536	0.932321	hypothetical protein	197.55	489.674	2.47874
TGME49_246710	41.5001	34.8922	-1.18938	35.3729	0.852357	hypothetical protein	118.703	51.7465	-2.29394
TGME49_205370	85.7693	70.0104	-1.22509	47.6371	0.55541	hypothetical protein	114.906	51.8193	-2.21744
TGME49_268210	54.9277	44.8286	-1.22528	57.3924	1.04487	AGC kinase	76.7633	189.495	2.46857
TGME49_264870	93.7434	71.9272	-1.30331	61.6625	0.65778	Sodium:neurotransmitter symporter family protein	337.337	145.944	-2.31141
TGME49_229220	187.101	132.739	-1.40954	198.047	1.0585	hypothetical protein	496.246	213.124	-2.32844
TGME49_286150	35.3422	25.0254	-1.41225	26.4501	0.748402	PAN/Apple domain-containing protein	156.908	347.583	2.2152
TGME49_277490	47.2675	33.3265	-1.41832	45.552	0.963706	hypothetical protein	108.297	49.9861	-2.16654
TGME49_262050	1286.24	899.095	-1.43059	1173.35	0.912233	Rhoptry kinase family protein ROP39	1748.79	694.799	-2.51697
TGME49_271770	26.7456	17.9561	-1.4895	23.8194	0.890588	hypothetical protein	149.962	74.1574	-2.02221
TGME49_239600	211.774	131.383	-1.61188	225.134	1.06309	ROP23 (incomplete catalytic triad)	1136.36	344.388	-3.29964
TGME49_218550	160.183	99.0364	-1.61742	116.461	0.727048	PIK3R4 kinase-related protein	281.198	95.4754	-2.94524
TGME49_250820	113.446	69.8918	-1.62317	79.3119	0.699116	hypothetical protein	171.02	77.3473	-2.21107
TGME49_297180	131.268	78.4018	-1.67429	100.651	0.766759	hypothetical protein	277.146	126.026	-2.19912
TGME49_255190	670.161	378.336	-1.77134	539.075	0.804396	myosin C	843.565	350.338	-2.40786
TGME49_224530	367.619	206.548	-1.77983	290.839	0.791142	IMC5 (ALV11)	491.615	232.271	-2.11656
TGME49_272520	675.197	371.433	-1.81782	739.275	1.0949	hypothetical protein	688.635	247.107	-2.78679
TGME49_226290	180.585	95.9932	-1.88123	136.249	0.754484	hypothetical protein	220.855	110.323	-2.00189
TGME49_289600	1485.39	705.56	-2.1	1545.81	1.04068	HSP29	2599.59	967.21	-2.68772
TGME49_200230	734.496	335.469	-2.2	788.29	1.07324	MIC17C	2599.04	825.899	-3.14692
TGME49_232280	394.399	178.771	-2.2	400.62	1.01577	hypothetical protein	551.699	243.707	-2.26378
TGME49_289100	111.926	51.9598	-2.2	91.8123	0.820293	hypothetical protein	188.804	104.912	-1.79964
TGME49_306270	1059.37	428.61	-2.2	1203.83	1.13636	hypothetical protein	624.318	259.772	-2.40333
TGME49_232410	3042.17	1129.16	-2.7	3392.98	1.11531	PDI family protein	6234.53	2218.47	-2.81028
TGME49_229930	1041.23	373.768	-2.8	1046.55	1.0051	p25-alpha domain-containing protein	1460.24	463.001	-3.15387
TGME49_292110	82.5362	29.9735	-2.8	96.8433	1.17334	formate/nitrite transporter	279.761	158.955	-1.76001
TGME49_221630	123.856	40.6704	-3	101.701	0.821126	hypothetical protein	204.692	108.247	-1.89098
TGME49_233300	89.1006	25.5686	-3.48476	69.4427	0.779375	rhoGAP protein	124.93	41.1574	-3.03542
TGME49_276930	465.698	129.378	-3.6	502.225	1.07844	hypothetical protein	1461.8	451.608	-3.23689
TGME49_225790	346.033	76.8507	-4.5	316.146	0.913632	PDI family protein	499.936	118.725	-4.21087
TGME49_226310	195.831	12.4798	-15.7	67.814	0.346288	zinc finger (CCCH type)	59.4883	11.9312	-4.98595
TGME49_318470	191.551	6.398	-29.9	36.0912	0.188415	AP2IV-4	195.57	11.6434	-16.7966
TGME49_289690	6743.82	5795.65	-1.1636	7341.53	1.08863	GAPDH2	8915	8402.08	-1.06105
