# Supplementary material for: Transcriptional repression by ApiAP2 factors is central to chronic toxoplasmosis
Source: PLoS Pathog. 2018 May 2;14(5):e1007035. doi: 10.1371/journal.ppat.1007035 (PMC5951591; doi:10.1371/journal.ppat.1007035)
Supplement: S2 Dataset — (XLSX) [file ppat.1007035.s002.xlsx]

## Sheet: All combined
Dataset S2. Common and specific gene targets of four ApiAP2 transcription factors (two prepressors, AP2IV-4 & AP2IX-9, and two activators, AP2XI-4 & AP2IV-3). Column G indicates genes included in Figure 6 of the main paper. Green highlighted rows are genes controlled by 3 or 4 ApiAP2 factors, while blue highlighted rows are controlled by two ApiAP2 factors.
Gene ID	AP2IV-3	AP2XI-4	AP2IV-4	AP2IX-9	Product Name	Summary Fig
TGME49_207210	X	X	X	X	hypothetical protein (UNK)
TGME49_202020		X	X	X	DnaK-TPR
TGME49_207130		X	X	X	SRS49A (= SAG2Y)
TGME49_208740	X		X	X	microneme protein (MIC UNK)
TGME49_216140		X	X	X	tetratricopeptide repeat-containing protein
TGME49_225290		X	X	X	bradyzoite-NTPase (B-NTPase)	x
TGME49_253330		X	X	X	BPK1	x
TGME49_252640	X	X		X	TgPMA1
TGME49_259020	X	X		X	bradyzoite antigen (BAG1)	x
TGME49_261650		X	X	X	hypothetical protein
TGME49_280580		X	X	X	SAG-related sequence SRS35B (SAG4.2)
TGME49_291040	X	X		X	lactate dehydrogenase (LDH2)	x
TGME49_207140			X	X	SRS49B (= SAG2X)
TGME49_207150		X		X	SAG-related sequence SRS49C
TGME49_208730			X	X	MCP4	x
TGME49_240470	X	X			hypothetical protein
TGME49_268860		X		X	enolase 1 (ENO1)	x
TGME49_280570		X		X	SAG-related sequence SRS35A
TGME49_267670	X			X	hypothetical protein
TGME49_290970			X	X	8-amino-7-oxononanoate synthase
TGME49_320190		X	X		SRS16B (= SRS9)	x
TGME49_203290				X	hypothetical protein
TGME49_207150			X		SRS49C (= SAG2D)	x
TGME49_209755				X	hypothetical protein
TGME49_209985				X	cAMP-dependent protein kinase
TGME49_213072			X		Sec1 domain containing family
TGME49_215500			X		TPR repeat containing protein
TGME49_215775	X				Rhoptry kinase family protein ROP8	x
TGME49_218910				X	hypothetical protein
TGME49_221550		X			CMGC kinase, MAPK family, MEK kinase-related
TGME49_224170		X			SRS domain-containing protein
TGME49_227430	X				hypothetical protein
TGME49_232400				X	PAN domain-containing protein
TGME49_234440			X		aminotransferase
TGME49_235700			X		sedoheptulose-1,7 bisphosphatse
TGME49_236010			X		prenylcysteine oxidase
TGME49_237170			X		hypothetical protein
TGME49_238440	X				SRS22A
TGME49_240930				X	MoaC family protein
TGME49_246070			X		SRS56A
TGME49_250930			X		hypothetical protein
TGME49_250940			X		hypothetical protein
TGME49_253340		X			hypothetical protein
TGME49_255210				X	ATPase, AAA family protein
TGME49_264150	X				hypothetical protein
TGME49_268210				X	AGC kinase
TGME49_268220				X	hypothetical protein
TGME49_273110			X		SRS30D
TGME49_278080		X			hypothetical protein
TGME49_286000	X				hypothetical protein
TGME49_289920				X	hypothetical protein
TGME49_290000				X	hypothetical protein
TGME49_291910				X	hypothetical protein
TGME49_292260			X		SRS36B (= SAG5D)
TGME49_293790				X	hypothetical protein
TGME49_301210			X		NAD(P) transhydrogenase
TGME49_301890			X		Toxoplasma gondii family B protein
TGME49_306450				X	short chain dehydrogenase family protein, putative
TGME49_311370		X			Methylmalonate-semialdehyde dehydrogenase
TGME49_314250	X				bradyzoite rhoptry protein BRP1	x
TGME49_319340				X	hypothetical protein
