# Supplementary material for: Transcriptional repression by ApiAP2 factors is central to chronic toxoplasmosis
Source: PLoS Pathog. 2018 May 2;14(5):e1007035. doi: 10.1371/journal.ppat.1007035 (PMC5951591; doi:10.1371/journal.ppat.1007035)
Supplement: S3 Dataset — (XLSX) [file ppat.1007035.s003.xlsx]

## Sheet: Strains
Database S3 Transgenic strains produced for this study
Name in this study	experimental use	Parent strain	Transgene/selectable marker	Drug Selection	Clone #
AP2IV-4HA	endogenous expression of AP2IV-4	RHΔhxgprtΔku80	endogenous promoter::AP2IV-4(3xHA)/DHFR-TS	pyrimethamine	A2, C9
RH-DDAP2IV-4	conditional expression of AP2IV-4	RHΔhxgprt	tubulin promoter:(DD-3xHA)-AP2IV-4/sagCAT	chloramphenicol	B5
RHCre-318480MYC	endogenous expression of 318480	RHΔhxgprtΔku80 diCRE	endogenous promoter::318480(3xMYC)/HXGPRT/loxP	pyrimethamine	IB9
RHCre-AP2IV-4floxed	endogenous expression of 318480 endogenous expression of AP2IV-4	RHΔhxgprtΔku80 diCRE	endogenous promoter::318480(3xMYC)/HXGPRT/loxP endogenous promoter::AP2VI-1(3xHA)/DHFR/loxP	pyrimethamine/HXGPRT	ID6
RHCre-Δap2IV-4	knockout of AP2IV-4	RHCre-AP2IV-4floxed	endogenous promoter::318480(3xMYC)/DHFR-TS/loxP	HXGPRT	27, 30
RHCre-Δap2IV-4::AP2IV-4	complemented AP2IV-4 knockout	RHCre-Δap2IV-4	cosmid PSBM794	Phleomycin	n/a
PruQ-318480MYC	endogenouse expression of 318480	PruΔhxgprtΔku80	endogenous promoter::318480(3xMYC)/HXGPRT/loxP	HXGPRT	B8
PruQ-AP2IV-4floxed	endogenous expression of 318480 endogenous expression of AP2IV-4	PruΔhxgprtΔku80	endogenous promoter::318480(3xMYC)/HXGPRT/loxP endogenous promoter::AP2IV-4(3xHA)/DHFR/loxP	pyrimethamine/HXGPRT	C3
PruQ-Δap2IV-4	knockout of AP2IV-4	PruQ-AP2IV-4floxed	endogenous promoter::318480(3xMYC)/DHFR-TS/loxP	HXGPRT	10, 34
PruQ-Δap2IV-4::AP2IV-4	complemented AP2IV-4 knockout	PruQ-Δap2IV-4	cosmid PSBM794	Phleomycin	n/a
AP2VI-1HA	endogenous expression of AP2VI-1	RHΔhxgprtΔku80	endogenous promoter::AP2VI-1(3xHA)/DHFR-TS	pyrimethamine	A2

## Sheet: Oligonucleotides
Dataset S3 Oligonucleotides used in this study.
Oligonucleotide function	Gene/locus	Orientation	Oligonucleotides (5'->3')
Tagging of endogenous gene loci with 3xhemagglutinin (HA) or 3x MYC epitope tags
LIC 5' primer for AP2IV-4	AP2IV-4	Forward	TACTTCCAATCCAATTTAATGCGACTCTCTCTGCCATTGGCCCG
LIC 3' primr for AP2IV-4	AP2IV-4	Reverse	TCCTCCACTTCCAATTTTAGCGGCGAGCATGATGGTCTGCTTGACGTC
LIC AP2IV-4 5' primer to check for recombination	AP2IV-4	Forward	CAGGAGCTGTGTGAGCACGAGC
LIC-HA 3' primer to check for 3' recombination	N/A	Reverse	CGCATATCGGGCACATCATAGGGAT
LIC 5' primer for TGGT1_318480	TGGT1_318480	Forward	TACTTCCAATCCAATTTAATGCTGGTCCCGAGAAGAACCATGAG
LIC 3' primr for TGGT1_318480	TGGT1_318480	Reverse	TCCTCCACTTCCAATTTTAGCTACAGGTGCGTCCTGTAAGGAACTGCT
LIC TGGT1_318480 5' primer to check for recombination	TGGT1_318480	Forward	GGAACGTGAGGCCGATGATGG
LIC-MYC 3' primer to check for 3' recombination	N/A	Reverse	CTGTGTGAAATGCCACATGAAGAGTC
LIC 5' primer for AP2VI-1	AP2VI-1	Forward	TACTTCCAATCCAATTTAATGCGAACAGACATTCACATCGGACTTATCTCCAAC
LIC 3' primr for AP2VI-1	AP2VI-1	Reverse	TCCTCCACTTCCAATTTTAGCCGCGTGGGCCGCTGATACTTCAGC
LIC AP2VI-1 5' primer to check for recombination	AP2VI-1	Forward	GAG AAG CAA GAG GCC ACA GAG GCC
LIC-HA 3' primer to check for 3' recombination	N/A	Reverse	CGCATATCGGGCACATCATAGGGAT
Introduction of loxP sites into pLIC vectors
insertion of loxP site into pLIC vectors	N/A	Forward	attgggcccATAACTTCGTATAGCATACATTATACGAAGTTATgctggcgtaatagcgaagagg
insertion of loxP site into pLIC vectors	N/A	Reverse	attgggcccgcgattaagttgggtaacgccag
AP2IV-4 3 fragment knockout constructs
attB4 AP2IV-4	5' UTR AP2IV-4	Forward	GGGGACAACTTTGTATAGAAAAGTTGAAGACGGTGACGGTGGTACGGTTG
attB1r AP2IV-4	5' UTR AP2IV-4	Reverse	GGGGACTGCTTTTTTGTACAAACTTGCCCTGTGGAAGCCACTGCCTTG
attB2r AP2IV-4	3' UTR AP2IV-4	Forward	GGGGACAGCTTTCTTGTACAAAGTGGAACGCAAGGCTGCCATGGAAGCG
attB3 AP2IV-4	3' UTR AP2IV-4	Reverse	GGGGACAACTTTGTATAATAAAGTTGCCGACACTGAGGTGTGTGCGCG
AP2IV-4 3 Frag KO verify	5' UTR AP2IV-4	Forward	GAGCCTGCCGTCGGACACTGG
AP2IV-4 3 Frag KO verify	3' UTR AP2IV-4	Reverse	CTTCGCGTTCACCGAGGCGCC
AP2IV-4 conditional expression construct
cloning AP2IV-4 CDS into pCTDDHA3 (MfeI)	AP2IV-4 CDS	Forward	atacaattgGCCGCACCCGCACCGAGCGCG
cloning AP2IV-4 CDS into pCTDDHA3 (EcoRV)	AP2IV-4 CDS	Reverse	tatgatatcTCAGGCGAGCATGATGGTCTGCTTGACGTCGCCAGAAGGAGAGAGAAAAGACGCAATGTCTCCTGTCTCGCCTCCTTCCGTCCCCTCTGTCGG
Recombinant protein construct
pGEX4T3	AP2IV-4 recombinant protein-PBM	Forward	TATGGATCCGTACCCTTGAGAGCAGACGTGAC
pGEX4T3	AP2IV-4 recombinant protein-PBM	Reverse	ATAGCGGCCGCGTGCGAGAGGCACAGTTTGCCCTGA
Semi quantitive RT-PCR
RT-PCR	AP2IV-4 +5952 (from start)	Forward	GTCGCGTGATCCGCGATCAGG
RT-PCR	AP2IV-4 @ stop codon	Reverse	GGCGAGCATGATGGTCTGCTTGACG
RT-PCR	GAPDH	Forward	GTCAATCATTCTGTCAATTCGA
RT-PCR	GAPDH	Reverse	ACACCATGTAGTCCAGGGACATG
RT-PCR	CST1	Forward	CCTGTGGTTTTCGAGCTTCC
RT-PCR	CST1	Reverse	TCGAAGAGTGACGTAGCAGG
DNA probes for EMSA
EMSA	PBM motif validation	Forward	TTTGTAATATACGCTCCACCGCGTGCACCCCCCTCGACATGCCCCCGTATTGCTGATCG
EMSA	PBM motif validation	Reverse	CGATCAGCAATACGGGGGCATGTCGAGGGGGGTGCACGCGGTGGAGCGTATATTACAAA
EMSA	PBM scrambled cold	Forward	TACCCTGCCTCTTGTAGTAGTAACGTAAAAGAGGTAACGTGGTCAAATGCGATCAGAGAT
EMSA	PBM scrambled cold	Reverse	ATCTCTGATCGCATTTGACCACGTTACCTCTTTTACGTTACTACTACAAGAGGCAGGGTA
Target regions for ChIP-qPCR
ChIP-qPCR	SRS9 region 1	Forward	GGACTTCTTGGATCCATTTC
ChIP-qPCR	SRS9 region 1	Reverse	AGACTCTGACACAGGGA
ChIP-qPCR	SRS9 region 2	Forward	TGCCAGAAATCCCACAA
ChIP-qPCR	SRS9 region 2	Reverse	TAGTGTCGGAATCAAAGAGG
ChIP-qPCR	SRS9 region 3	Forward	CGGACTATCTGTGGCTTT
ChIP-qPCR	SRS9 region 3	Reverse	CACGAAAGCAAGGAACAC
ChIP-qPCR	SRS9 region 4	Forward	AGGTCTTCGACACAATCC
ChIP-qPCR	SRS9 region 4	Reverse	GCTGATTCACGTTGCTTC
ChIP-qPCR	SRS9 region 5	Forward	AAAGAGGAGAGCGGCTA
ChIP-qPCR	SRS9 region 5	Reverse	CACGGGTTTGCTTAAACG
ChIP-qPCR	SRS9 region 6	Forward	GAGCAGTCAGCTCTAGTAAT
ChIP-qPCR	SRS9 region 6	Reverse	GGACCCAATGATACAACATC
ChIP-qPCR	SRS9 region 7	Forward	TGACCTGATGTTTAGCAGTC
ChIP-qPCR	SRS9 region 7	Reverse	GACGATTGCTGCGAAGA
ChIP-qPCR	SRS9 region 8	Forward	GGCGTTTGTGACTGTAGA
ChIP-qPCR	SRS9 region 8	Reverse	GGTTCCTTGAGTTGTTGAAG
ChIP-qPCR	BAG1 region 1	Forward	GCCAGTCGAAAGCCATTAAA
ChIP-qPCR	BAG1 region 1	Reverse	TCACGCGTTCACTGCTACTC
ChIP-qPCR	BAG1 region 2	Forward	CGTCCTCTCTGTCCACGAAC
ChIP-qPCR	BAG1 region 2	Reverse	ATGGGGAACTGGAGGAAGAT
ChIP-qPCR	BAG1 region 3	Forward	AGGTCGCCCGTCTTATTCTT
ChIP-qPCR	BAG1 region 3	Reverse	ACCCAAACATGGAGTTCAGG
ChIP-qPCR	BAG1 region 4	Forward	GACGAGTTCCCGTTTTTCCT
ChIP-qPCR	BAG1 region 4	Reverse	ACAGAGGTCGCTGCGTAGAC
ChIP-qPCR	BAG1 region 5	Forward	CTTTTGCCAAAGGAGACCTG
ChIP-qPCR	BAG1 region 5	Reverse	ATGCCACTGAGCTACACACG
ChIP-qPCR	BAG1 region 6	Forward	GTCGTCTGTGAGAGCGTCAA
ChIP-qPCR	BAG1 region 6	Reverse	GACCTGGGCTTTGCAGATAA
